# Supplementary material for: Doping of a Zn-MOF with Eu3+ and Tb3+ for application in the manufacture of a WLED
Source: Royal Society of Chemistry journal article supplement (doi:10.1039/d1tc03454e), 2021-01-01
Supplement: d1tc03454e1.pdf [file d1tc03454e1.pdf]

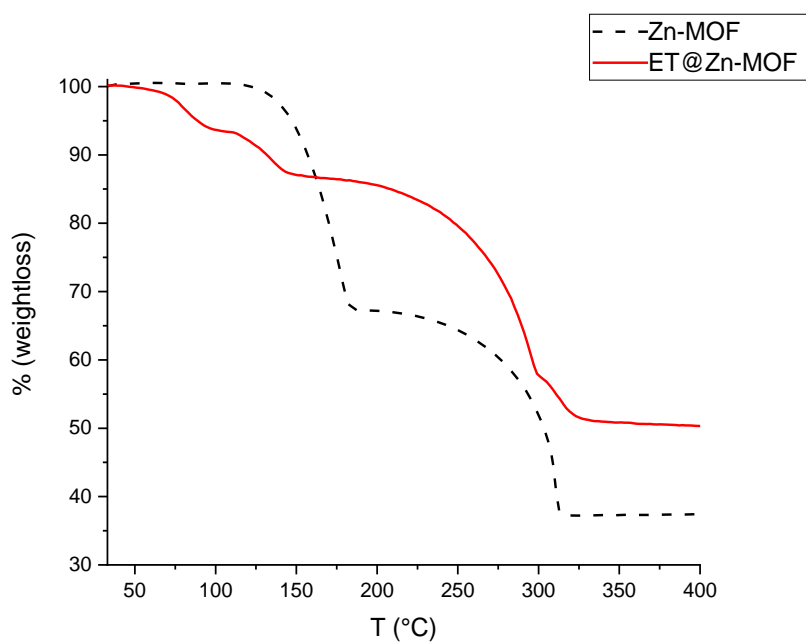

Fig. S1. TGA compound 1 and mixture X.

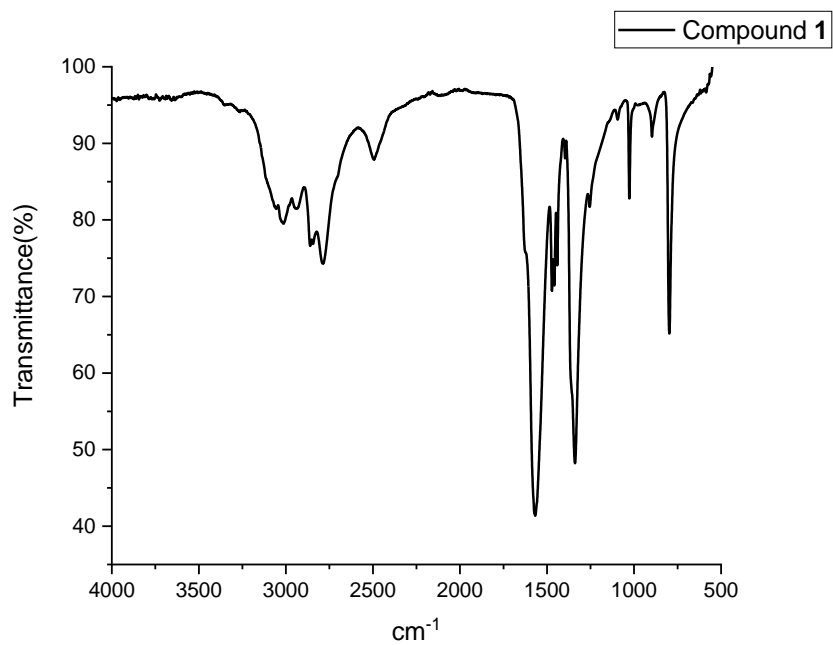

Fig. S2. IR compound 1.

**Table S3.** labels of compound 1 doped with different proportions of  $\text{Eu}^{3+}$  and  $\text{Tb}^{3+}$ , separately.

| $\text{Tb}_x@ (1)$   | Label     | $\text{Eu}_x@ (1)$   | Label     |
|----------------------|-----------|----------------------|-----------|
| $\text{Tb}_{0.05}@1$ | <b>2</b>  | $\text{Eu}_{0.05}@1$ | <b>12</b> |
| $\text{Tb}_{0.10}@1$ | <b>3</b>  | $\text{Eu}_{0.10}@1$ | <b>13</b> |
| $\text{Tb}_{0.15}@1$ | <b>4</b>  | $\text{Eu}_{0.15}@1$ | <b>14</b> |
| $\text{Tb}_{0.20}@1$ | <b>5</b>  | $\text{Eu}_{0.20}@1$ | <b>15</b> |
| $\text{Tb}_{0.25}@1$ | <b>6</b>  | $\text{Eu}_{0.25}@1$ | <b>16</b> |
| $\text{Tb}_{0.30}@1$ | <b>7</b>  | $\text{Eu}_{0.30}@1$ | <b>17</b> |
| $\text{Tb}_{0.35}@1$ | <b>8</b>  | $\text{Eu}_{0.35}@1$ | <b>18</b> |
| $\text{Tb}_{0.40}@1$ | <b>9</b>  | $\text{Eu}_{0.40}@1$ | <b>19</b> |
| $\text{Tb}_{0.45}@1$ | <b>10</b> | $\text{Eu}_{0.45}@1$ | <b>20</b> |
| $\text{Tb}_{0.50}@1$ | <b>11</b> | $\text{Eu}_{0.50}@1$ | <b>21</b> |

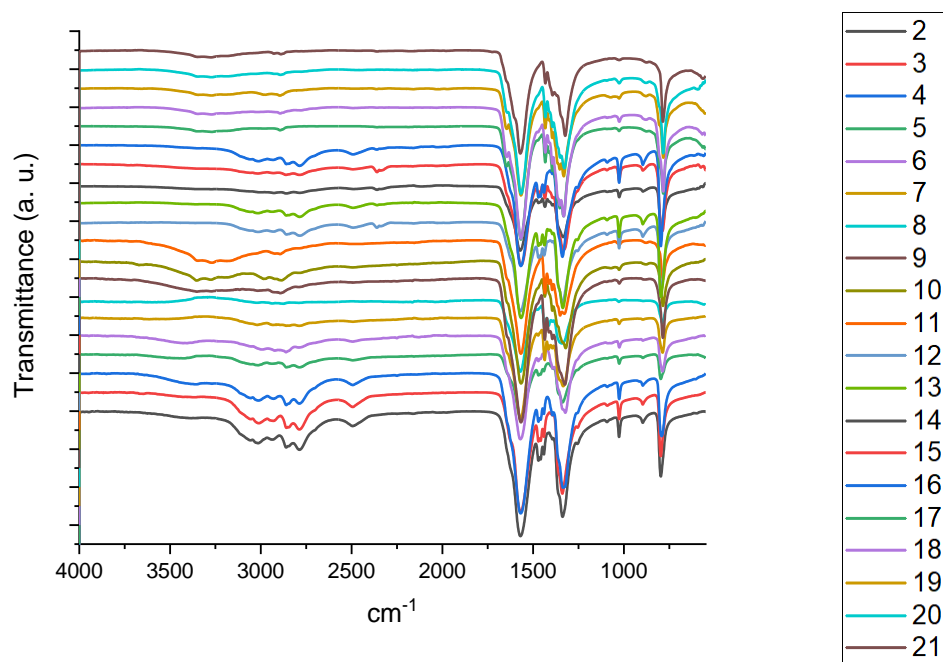

**Fig. S4.** IR all mixture of Ln@1.

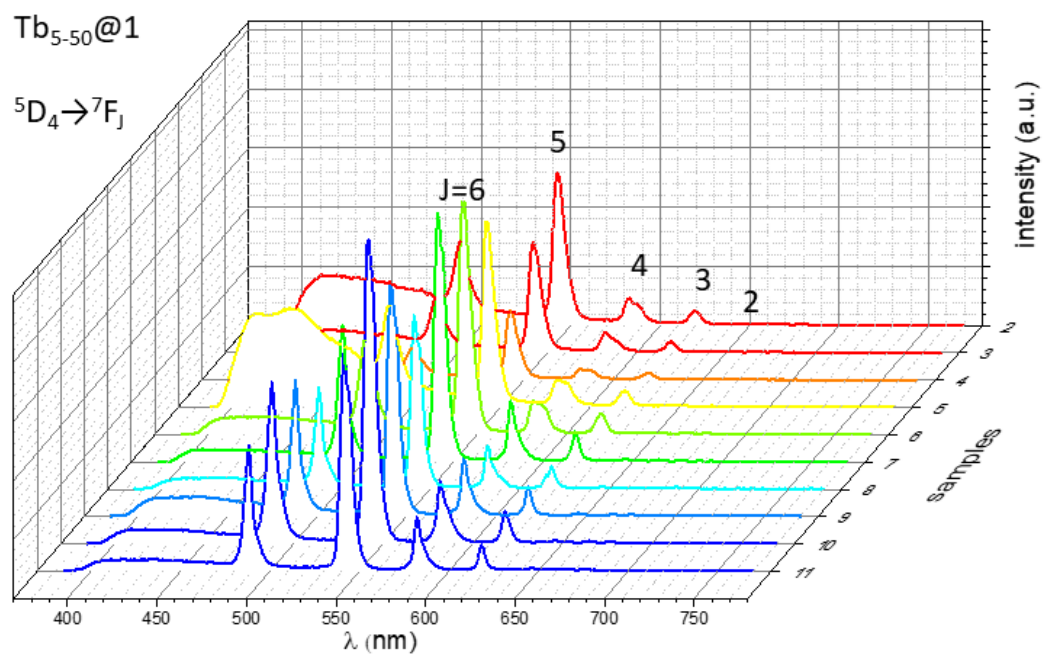

**Fig. S5.** Emission spectra for Tb<sub>5-50</sub>@1 (samples 2-11).

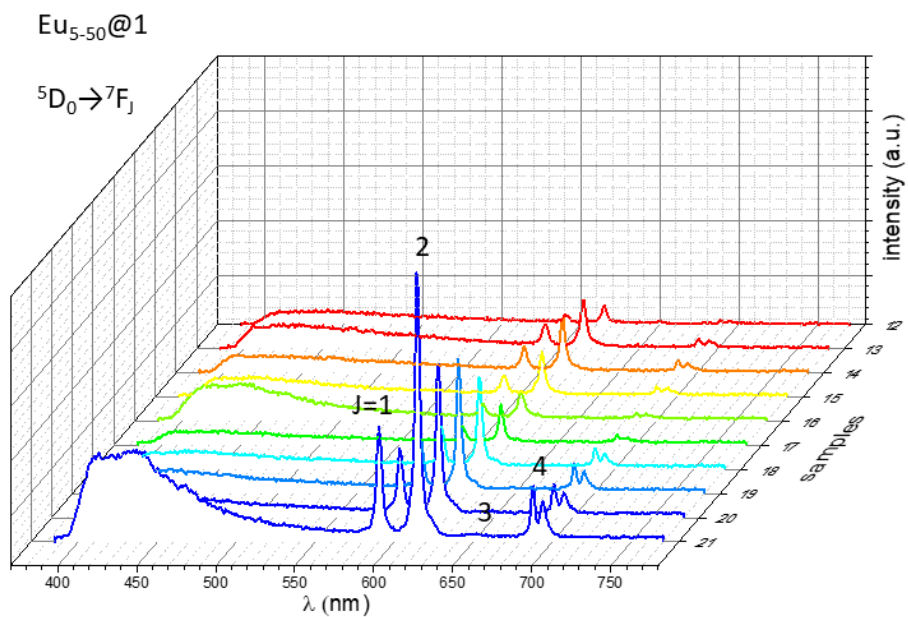

Fig. S6. Emission spectra for Eu<sub>5-50</sub>@1 (samples 12-21).

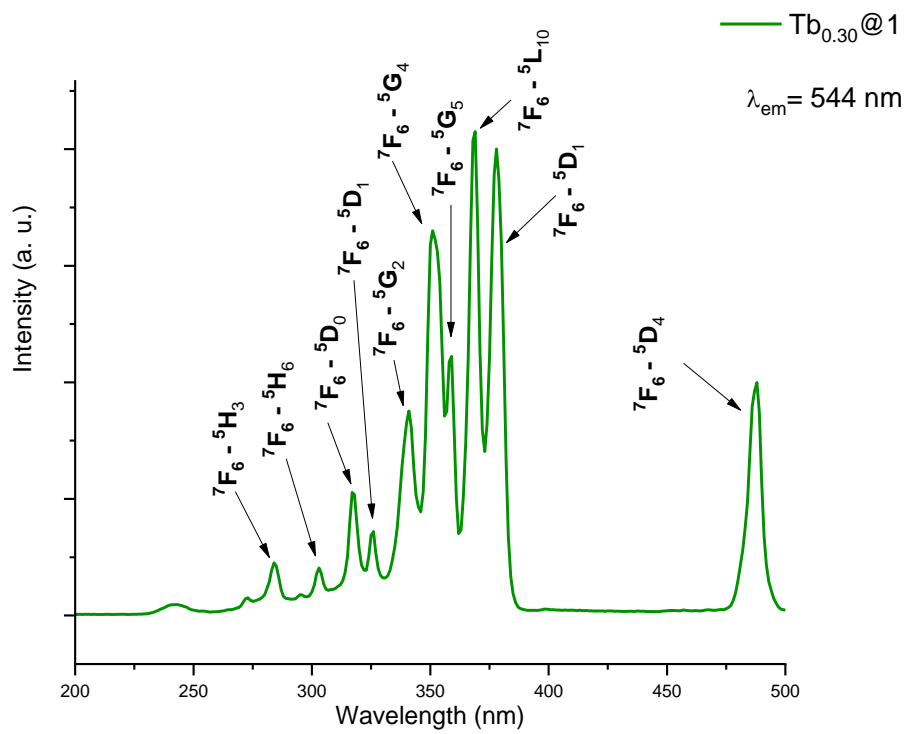

**Fig. S7.** Excitation spectrum for Tb<sub>0.30</sub>@1.

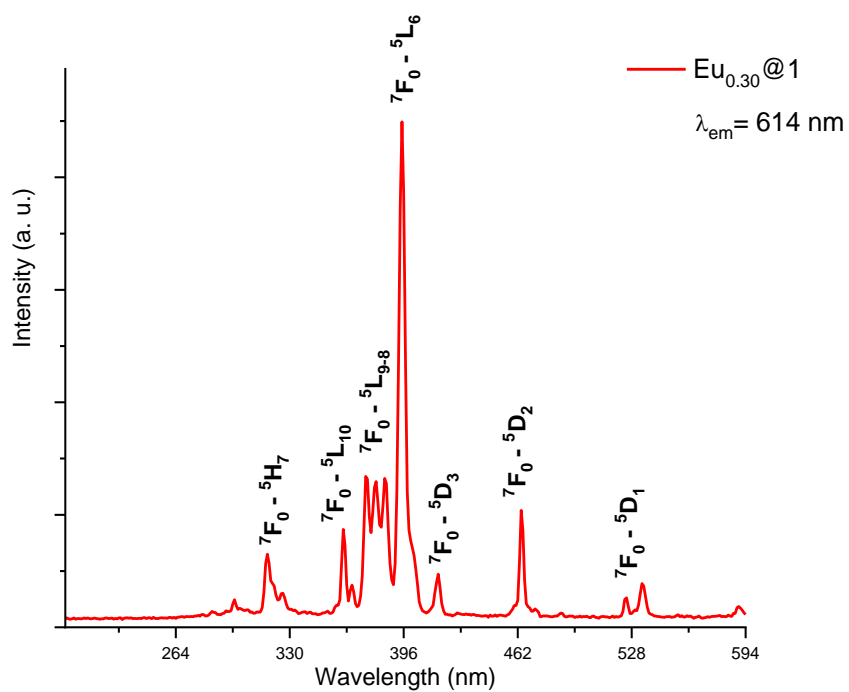

**Fig. S8.** Excitation spectrum for Eu<sub>0.30</sub>@1.
